# Supplementary material for: Differences in COVID-19 Risk by Race and County-Level Social Determinants of Health among Veterans
Source: MDPI journal article supplement (doi:10.3390/ijerph182413140), 2021-12-13
Supplement: s1 [file s1]

**Supplementary Table S1.** Data Dictionary for county-level socioeconomic measures.

| Measure                                                                          | Source                                     | Source Details                                                           | Original Variable        |
|----------------------------------------------------------------------------------|--------------------------------------------|--------------------------------------------------------------------------|--------------------------|
| Percentage of Persons in Deep Poverty, 2017                                      | Area Health Resources Files                | (.1) Table B17024 American Community Survey 2013-2017                    | F15419-13                |
| Percentage Persons 65+ in Deep Poverty, 2017                                     | Area Health Resources Files                | (.1) Table B17024 American Community Survey 2013-2017                    | F15425-13                |
| Percentage without High School Diploma, Ages 25+, 2013-2017 (5-year)             | Centers for Disease Control and Prevention | American Community Survey 2013-2017                                      | prop_edu_less_highschool |
| Percentage without 4+ Years College, Ages 25+, 2013-2017 (5-year)                | Centers for Disease Control and Prevention | American Community Survey 2013-2017                                      | prop_edu_less_college    |
| Percentage Food Stamp/Supplemental Nutrition Assistance Program Recipients, 2015 | Centers for Disease Control and Prevention | Health Resources and Services Administration; Area Health Resources File | prop_food_stamp_sp_recip |
| Percentage Living in Poverty, All Ages, 2016                                     | Centers for Disease Control and Prevention | U.S. Census Bureau (SAIPE); Small Area Income and Policy Estimates       | prop_poverty             |
| Percentage without Health Insurance, Under Age 65, 2016                          | Centers for Disease Control and Prevention | U.S. Census Bureau (SAHIE) Small Area Health Insurance Estimates         | prop_uninsured           |
| Percentage Eligible for Medicaid, All Ages, 2012                                 | Centers for Disease Control and Prevention | Health Resources and Services Administration; Area Health Resources File | prop_medicaid_eligible   |
| Percentage in Crowded Housing, 2013-2017                                         | Diversity Data for Kids                    | Diversity Data Kids (25014_1_P_050_5_crowded_housing_race)               | total_est                |
| Percentage 65+ living alone, 2018                                                | US Census Bureau                           | American Community Survey 5-year 2018 Table DP02                         | DP02_0012PE              |
| Percentage of households where grandparent have children under 18, 2018          | US Census Bureau                           | American Community Survey 5-year 2018 Table DP02                         | DP02_0043PE              |
| Percentage of Households without a computer, 2018                                | US Census Bureau                           | American Community Survey 5-year 2018 Table DP02                         | DP02_0151PE              |
| Percentage of households without broadband, 2018                                 | US Census Bureau                           | American Community Survey 5-year 2018 Table DP02                         | DP02_0152PE              |
| Percentage of US Non-Native Residents, 2018                                      | US Census Bureau                           | American Community Survey 5-year 2018 Table DP02                         | DP02_0087PE              |
| Percentage Non-White, 2018                                                       | US Census Bureau                           | American Community Survey 5-year 2018 Table DP02                         | DP02_0087E               |
| Median Household Income (thousands), 2016                                        | Centers for Disease Control and Prevention | U.S. Census Bureau (SAIPE); Small Area Income and Policy Estimates       | NA                       |
| Income Inequality (GINI Index), 2018                                             | US Census Bureau                           | American Community Survey 5-year 2018                                    | B19083_001E              |
| Unemployment Rate Ages 16+, 2017                                                 | Centers for Disease Control and Prevention | U.S. Bureau of Labor Statistics; Local Area Unemployment Statistics      | unemployment_rate        |

<sup>1</sup> Crowded housing defined as the number of occupied housing units with more than one occupant per room divided by the number of occupied housing units, times 100, for the total population and by race/ethnicity. <sup>2</sup> Data were retrieved from the American Community Survey, U.S. Census Bureau, U.S. Bureau of Labor Statistics, and Diversity Data for Kids as previously described in Chin et al 2020, and available at <https://bmjopen.bmj.com/content/10/9/e039886>.

**Supplementary Table S2.** Correlation between County Level Social Determinants of Health.

| Variables                         | 1     | 2     | 3     | 4     | 5     | 6     | 7     | 8     | 9     | 10    | 11    | 12    | 13    | 14    | 15    | 16    | 17   | 18   |
|-----------------------------------|-------|-------|-------|-------|-------|-------|-------|-------|-------|-------|-------|-------|-------|-------|-------|-------|------|------|
| 1) Persons in Deep Poverty        | 1.00  |       |       |       |       |       |       |       |       |       |       |       |       |       |       |       |      |      |
| 2) Persons 65+ in Deep Poverty    | 0.44  | 1.00  |       |       |       |       |       |       |       |       |       |       |       |       |       |       |      |      |
| 3) Without High School Diploma    | 0.53  | 0.38  | 1.00  |       |       |       |       |       |       |       |       |       |       |       |       |       |      |      |
| 4) Without 4+ Years College       | 0.35  | 0.24  | 0.71  | 1.00  |       |       |       |       |       |       |       |       |       |       |       |       |      |      |
| 5) Food Stamp/SNAP Recipients     | 0.71  | 0.40  | 0.66  | 0.59  | 1.00  |       |       |       |       |       |       |       |       |       |       |       |      |      |
| 6) Living in Poverty, All Ages    | 0.84  | 0.40  | 0.73  | 0.57  | 0.83  | 1.00  |       |       |       |       |       |       |       |       |       |       |      |      |
| 7) Without Health Insurance       | 0.33  | 0.26  | 0.60  | 0.42  | 0.33  | 0.44  | 1.00  |       |       |       |       |       |       |       |       |       |      |      |
| 8) Eligible for Medicaid, All Age | 0.60  | 0.36  | 0.63  | 0.56  | 0.84  | 0.73  | 0.20  | 1.00  |       |       |       |       |       |       |       |       |      |      |
| 9) Living in Crowded Housing      | 0.20  | 0.19  | 0.41  | 0.11  | 0.19  | 0.22  | 0.37  | 0.34  | 1.00  |       |       |       |       |       |       |       |      |      |
| 10) 65+ living alone              | 0.22  | 0.16  | 0.24  | 0.39  | 0.36  | 0.35  | 0.10  | 0.32  | -0.20 | 1.00  |       |       |       |       |       |       |      |      |
| 11) Households with children <1   | 0.28  | 0.27  | 0.60  | 0.43  | 0.41  | 0.39  | 0.46  | 0.40  | 0.48  | -0.08 | 1.00  |       |       |       |       |       |      |      |
| 12) Households w/out Computer     | 0.58  | 0.39  | 0.71  | 0.71  | 0.69  | 0.75  | 0.37  | 0.61  | 0.06  | 0.55  | 0.33  | 1.00  |       |       |       |       |      |      |
| 13) Households w/out broadband    | 0.61  | 0.39  | 0.73  | 0.73  | 0.69  | 0.77  | 0.46  | 0.61  | 0.09  | 0.49  | 0.38  | 0.94  | 1.00  |       |       |       |      |      |
| 14) Non-USA Native                | -0.16 | 0.03  | -0.03 | -0.48 | -0.23 | -0.22 | 0.05  | -0.09 | 0.52  | -0.32 | 0.11  | -0.40 | -0.41 | 1.00  |       |       |      |      |
| 15) Non-White                     | 0.44  | 0.33  | 0.47  | 0.06  | 0.47  | 0.48  | 0.43  | 0.41  | 0.53  | -0.10 | 0.50  | 0.24  | 0.28  | 0.44  | 1.00  |       |      |      |
| 16) Median Household Income       | -0.67 | -0.30 | -0.65 | -0.76 | -0.75 | -0.83 | -0.45 | -0.67 | -0.06 | -0.50 | -0.26 | -0.74 | -0.77 | 0.45  | -0.17 | 1.00  |      |      |
| 17) Income Inequality (Gini)      | 0.60  | 0.33  | 0.32  | -0.01 | 0.46  | 0.57  | 0.25  | 0.43  | 0.16  | 0.28  | 0.11  | 0.36  | 0.36  | 0.10  | 0.40  | -0.40 | 1.00 |      |
| 18) Unemployment Rate             | 0.46  | 0.30  | 0.50  | 0.44  | 0.58  | 0.57  | 0.28  | 0.54  | 0.23  | 0.27  | 0.39  | 0.49  | 0.46  | -0.08 | 0.41  | -0.46 | 0.29 | 1.00 |
